# Supplementary material
Source: PubMed Central journal article supplement (PMC7104319)
Supplement: mmc1.pdf [file mmc1.pdf]

Cell Reports

Supplemental Information

**Quantitative Proteomics Identifies  
Serum Response Factor Binding Protein 1  
as a Host Factor for Hepatitis C Virus Entry**

**Gisa Gerold, Felix Meissner, Janina Bruening, Kathrin Welsch, Paula M. Perin, Thomas F. Baumert, Florian W. Vondran, Lars Kaderali, Joseph Marcotrigiano, Abdul G. Khan, Matthias Mann, Charles M. Rice, and Thomas Pietschmann**

# SUPPLEMENTAL INFORMATION

## SUPPLEMENTAL FIGURES AND FIGURE LEGENDS

Figure S1

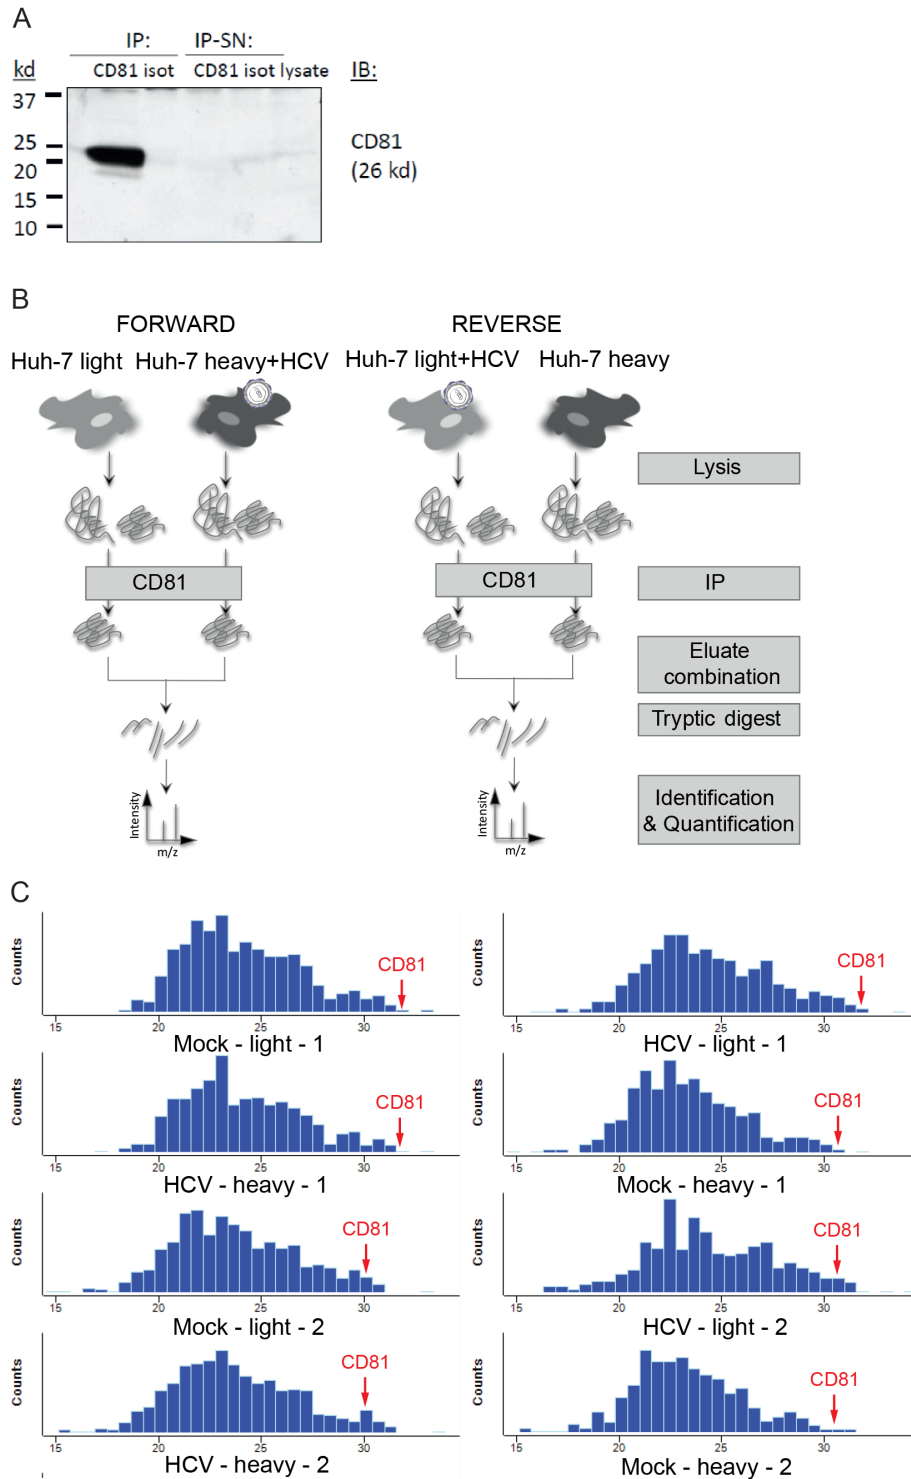

**Figure S1, Related to Figure 1. Quantitative MS approach for the identification of transient HCV entry factor interactions.**

- (A) Immunoblot of CD81 co-IPs from resting Huh-7 cells. Cells were lysed under membrane complex preserving conditions, proteins precipitated with anti-CD81 or an isotype control antibody and lysate, IP supernatants (IP-SN) and IP eluates (IP) analyzed by immunoblot.
- (B) Detailed scheme of the virus entry dependent interaction proteomics workflow. Heavy or light labeled Huh-7 cells were incubated with HCV J6/JFH clone 2 or treated with cellular supernatants from mock electroporated cells processed in the same way as the virus containing supernatants (mock). 15 min post inoculation, cells were lysed and co-immunoprecipitated with CD81 antibodies. Proteins from the two conditions were mixed, tryptically digested to peptides and analyzed by LC-MS/MS analysis. For both the forward (heavy: HCV; light: mock) and the reverse (heavy: mock; light: HCV) experiments two biological replicates were generated and analyzed.
- (C) Distribution of protein abundances from heavy and light labeled IPs in four biological replicates. Ion intensities (x-axis) are plotted against counts of detected ions (y-axis). CD81 (red arrow) is reproducibly detected with highest intensities in all samples independently of the presence of HCV.

Figure S2

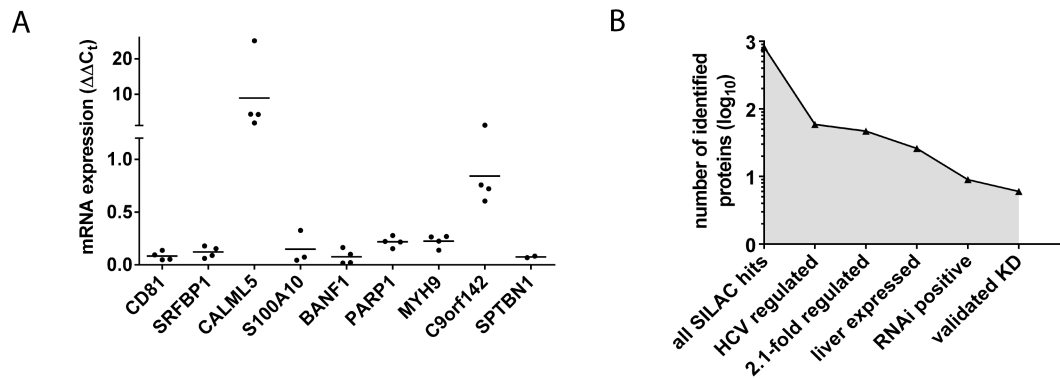

**Figure S2, Related to Figure 2. Identification of CD81 associating HCV entry co-factors.**

- (A) RNAi validation by quantitative RT PCR. Six of the eight successful siRNA pools reduced transcript levels to 25% or less. Transcript levels of Huh-7.5 cells 48 hpt with siRNAs were measured by SYBRgreen assay and normalized to GAPDH transcripts and scrambled siRNA controls. Four biological replicates with three technical replicates each are shown.
- (B) Statistics of the combined SILAC co-IP RNAi strategy. Stringent hit criteria revealed 26 HCV dependent CD81 binding partners, which are liver expressed and not exclusively localized to the nucleus. Six of these decrease HCV infectivity upon RNAi.

Figure S3

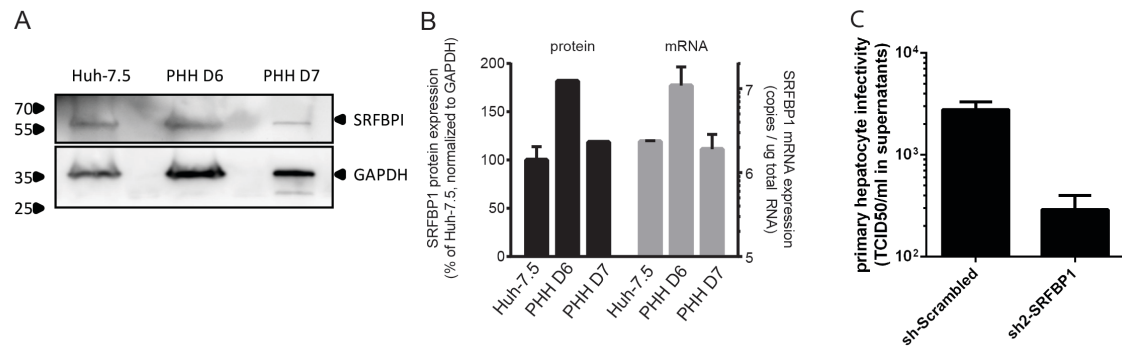

**Figure S3, Related to Figure 3. SRFBP1 is expressed in primary hepatocytes and required for HCV infection but not for HCV translation or replication.**

- (A) Immunoblot analysis of SRFBP1 in primary human hepatocyte lysates from two independent donors (PHH D6, PHH D7). GAPDH served as loading control.
- (B) Quantification of SRFBP1 protein (black bars) and *SRFBP1* transcript (grey bars) levels in primary human hepatocytes from two donors (PHH D6, PHH D7) normalized to GAPDH internal controls and to Huh-7.5 cells (black bars).
- (C) Primary human hepatocytes from a single donor were transduced with SRFBP1 shRNA encoding lentiviruses or a scrambled shRNA control. 24 hpt cells were infected with HCV (Jc1), washed 4 h later and supernatant collected 24 hpi. Infectious HCV in supernatants were titered on Huh-7.5 cells. Data represent mean +/- SD of two technical replicates.

Figure S4

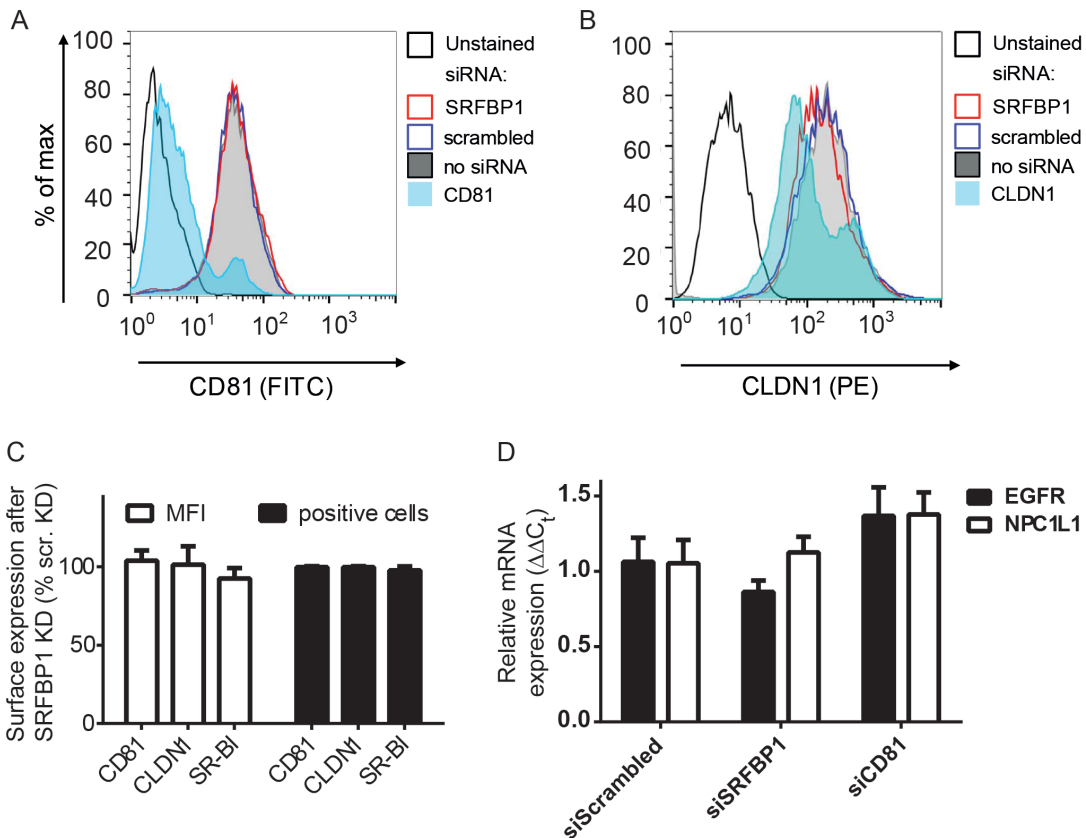

**Figure S4, Related to Figure 4. Expression of HCV entry factors and co-factors in not affected by SRFBP1 silencing.**

(A) Huh-7.5 cells were silenced for *SRFBP1* or *CD81* as described in Fig. 4B and surface expression levels of CD81 determined by antibody staining and flow cytometry. Unstained: FITC-conjugated isotype control antibody. The histogram is representative of four independent experiments and shows the counts of 10,000 cells per experimental condition.

(B) Flow cytometric analysis of CLDN1 as described in (A) after silencing for *SRFBP1* or *CLDN1*. Unstained: PE-conjugated secondary antibody only.

- (C) Quantification of HCV entry factor surface expression in Huh-7.5 cells after SRFBP1 silencing analyzed by flow cytometry (see Fig. 4 B). Mean fluorescence intensity (MFI) and number of antibody positive cells were normalized to scrambled siRNA samples and expressed as mean + SD of three independent experiments.
- (D) Transcript levels of the HCV entry co-factors epidermal growth factor receptor (EGFR) and Niemann-Pick C1-like protein 1 (NPC1L1) in Huh-7.5 cells 48 h post transfection with the indicated siRNAs. Expression normalized to GAPDH and siScrambled control. Mean + s.e.m. are shown.

Figure S5

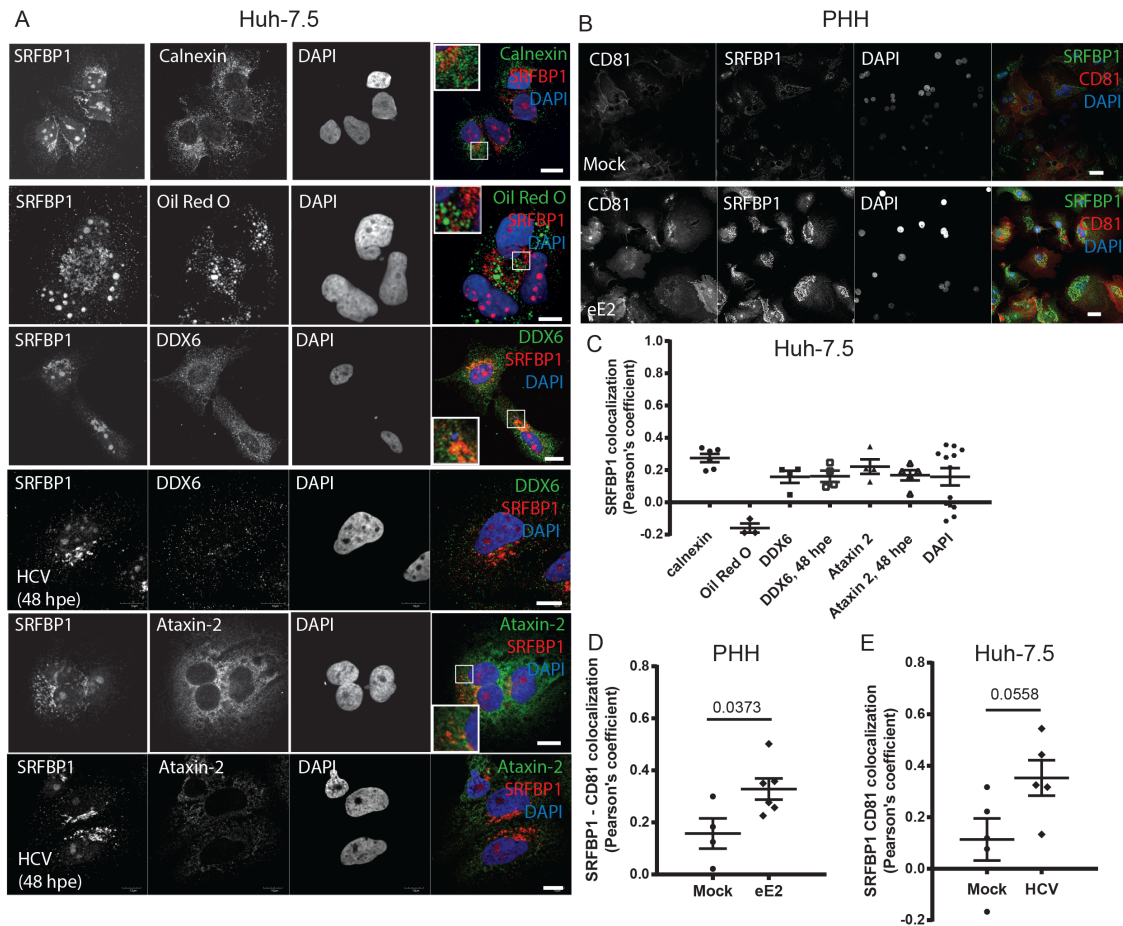

**Figure S5, Related to Figure 5. SRFBP1 does not localize to the ER, lipid droplets, p bodies or stress granules in the presence and absence of HCV infection and recruits to CD81 upon eE2 exposure.**

(A) Huh-7.5 cells were electroporated with HCV genotype 2a full length genomes (HCV) or left untreated and fixed 48 h later. Cells were stained for SRFBP1, the ER marker calnexin, the lipid droplet dye oil red O, the stress granule marker ataxin 2 and the p body marker DDX6 as described in Figure 4A. Insert: 2.2-fold magnification, scale bar: 10  $\mu$ m.



- (B) Primary human hepatocytes (PHH) were plated on collagenated cover slips, 6 h later incubated with purified eE2 or PBS (mock) for 15 min, fixed and then stained for SRFBP1 and CD81 as described in Figure 4A. Scale bar: 10  $\mu$ m.
- (C) Pearson's colocalization coefficient for SRFBP1 and calnexin, oil red O, DDX6, ataxin 2 or DAPI in resting Huh-7.5 cells or cells 48 h post electroporation with HCV genotype 2a full length genomes (48 hpe). Pearson's coefficients were calculated by intensity correlation analysis. Each dot represents one image frame. Mean and s.e.m. for at least four image frames are shown.
- (D) Pearson's colocalization coefficient for SRFBP1 and CD81 in PHH with and without eE2 incubation for 15 min calculated by intensity correlation analysis. Each dot represents one image frame. Mean and s.e.m. for at least four image frames and p value are shown.
- (E) Huh-7.5 cells were left untreated or incubated with HCV clone 2 (MOI 10) for 15 min, fixed and stained for SRFBP1 and CD81 as in Figure 4A. Pearson's colocalization coefficient for SRFBP1 and CD81 calculated by intensity correlation analysis. Each dot represents one image frame. Mean and s.e.m. for at least four image frames and p value are shown.

Figure S6

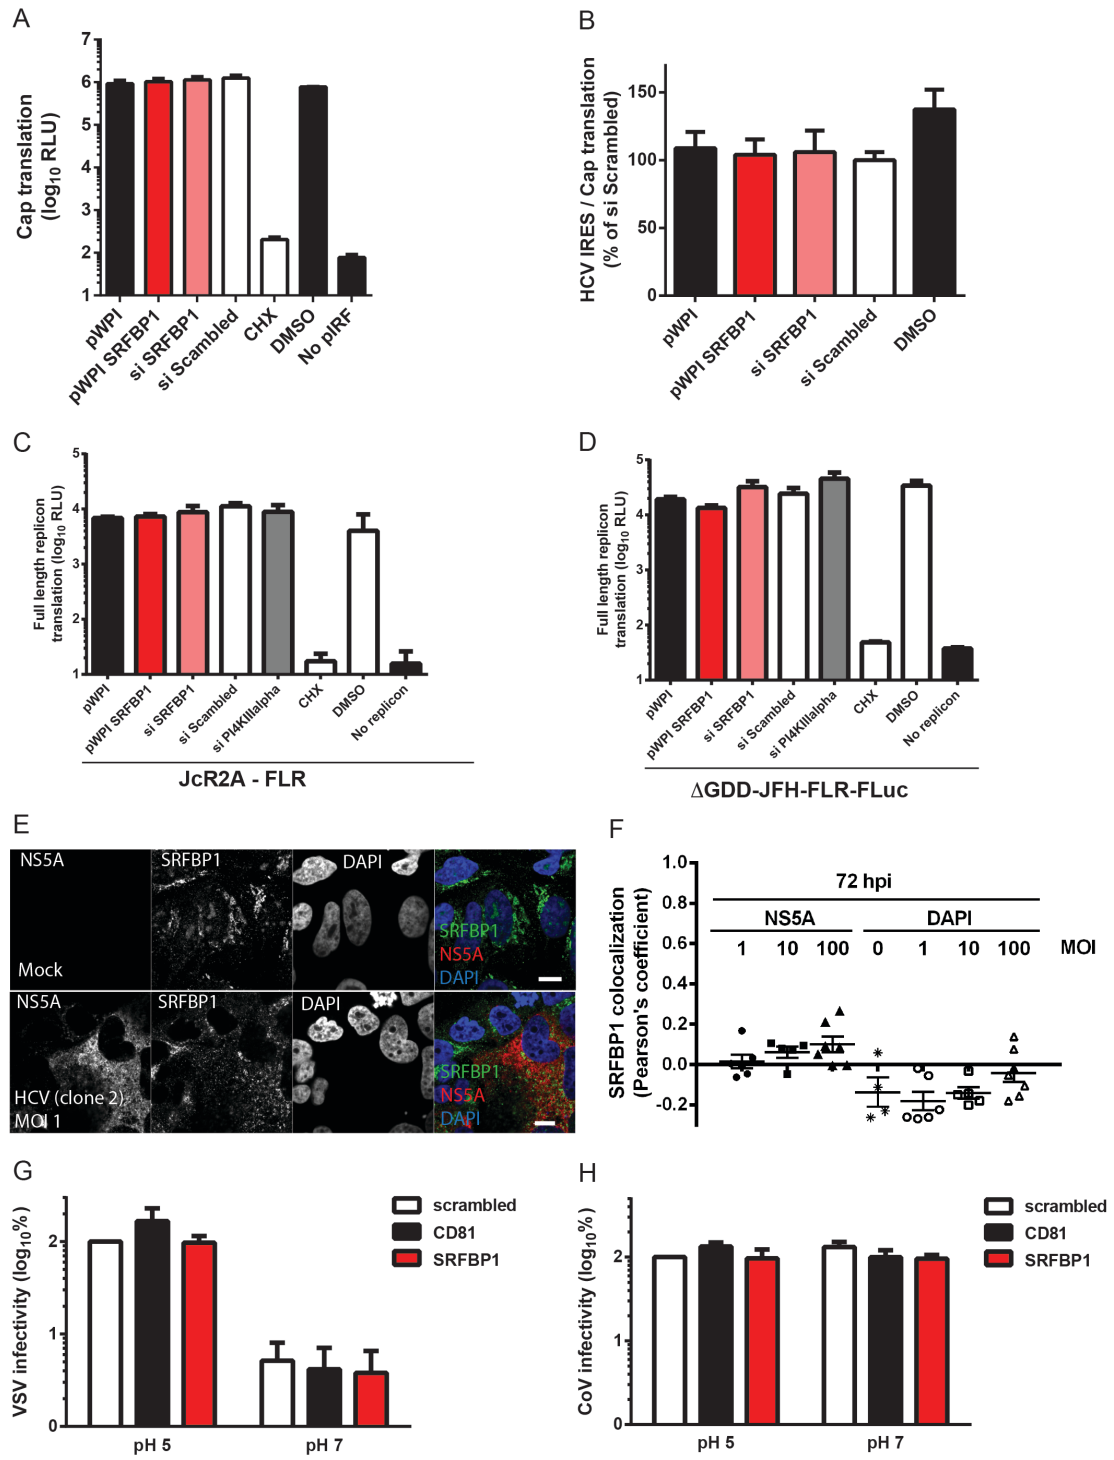

**Figure S6, Related to Figure 6. SRFBP1 is dispensable for HCV translation, replication, VSV and coronavirus infection in a plasma membrane fusion assay and does not localize to HCV replication complexes.**

(A, B) Bicistronic translational reporter assay with HCV IRES driven RLuc (see Figure 6D) and cap-dependent FLuc (A). Huh-7.5 cells were transfected with the indicated siRNA or transduced with the indicated pWPI expression construct, 48 h later transfected with translational reporter RNA. 8 h after reporter transfection luciferase activity in lysates was monitored. HCV IRES dependent translation normalized to cap-dependent translation shown in (B).

(C, D) Early replication reporter assay using full length HCV genomes expressing FLuc. Huh-7.5 cells were transfected with the indicated siRNA or transduced with the indicated pWPI expression construct, 48 h later JcR2A RNA (C) or replication deficient  $\Delta$ GDD-JFH-FLR-FLuc RNA (D) was transfected, cells lysed 8 hpt and luciferase activity monitored.

(E) Huh-7.5 cells were infected with HCV clone 2 (MOI 1) or left uninfected. 72 hpi cells were fixed and stained for SRFBP1 and NS5A as described in Figure 4A. Scale bar 10  $\mu$ m.

(F) Pearson's colocalization coefficient for SRFBP1 and NS5A in Huh-7.5 cells 72 h post HCV clone 2 infection with the indicated MOI calculated by intensity correlation analysis. Each dot represents one image frame. Mean and s.e.m. for at least four image frames.

(G, H) Plasma membrane fusion assay was performed as depicted and described in Figure 6F. VSV\* $M_Q$  (G) or HCoV229E-luc (H) were bound to cells at 4°C in the presence of concanamycin A and plasma membrane fusion induced by washing with a buffer of the indicated pH. Infectivity was monitored 24 h later by luciferase activity quantification. Mean and s.e.m. for 4 biological replicates are shown.

Figure S7

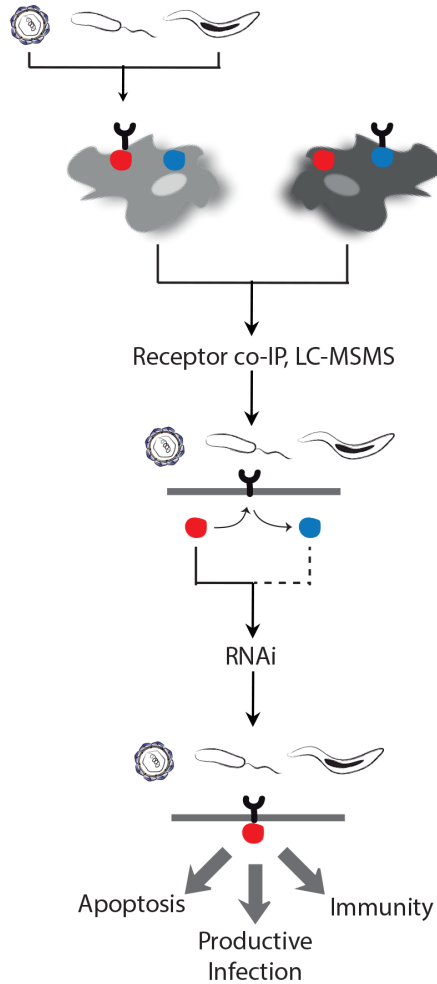

**Figure S7, Related to Figure 7. Interaction proteomics workflow for the study of early host-pathogen interactions.** The quantitative proteomics methodology described here is suited to reveal transient host factor - receptor interactions during pathogen entry. Briefly, susceptible cells are incubated with a pathogen or left untreated; then pathogen receptors are affinity enriched and differential receptor binding partners identified and analyzed for their functional role by RNAi. The strategy allows the identification of signaling pathways leading to cellular reprogramming like e.g. apoptosis, host factors for productive infection and innate immune sensing pathways.

## **SUPPLEMENTAL TABLES**

### **Table S1, Related to Figure 1. CD81 SILAC Dataset.**

SILAC ratios, heavy and light intensities for each label direction, significance analysis and protein annotations are listed. Please refer to Excel file “HCV CD81 SILAC.xlsx”.

**Table S2, Related to Figure 1. HCV-dependent CD81 interactions.**

Listed are the 26 selected HCV-dependent CD81 interactors, their Uniprot ID and the mean SILAC ratio of forward and reverse ratios.

| Protein name                                   | Uniprot ID                                                          | Gene name       | HCV/Mock  | -(Mock/HCV) |
|------------------------------------------------|---------------------------------------------------------------------|-----------------|-----------|-------------|
| <b>Associating proteins</b>                    |                                                                     |                 |           |             |
| Serum response factor-binding protein 1        | Q8NEF9                                                              | <i>SRFBP1</i>   | ∞         | n. def.     |
| Beta-II spectrin                               | Q01082-3;<br>Q01082;B2RP63;Q8WYB3                                   | <i>SPTBN1</i>   | ∞         | n. def.     |
| Calpactin I light chain                        | P60903;Q6FGE5                                                       | <i>S100A10</i>  | ∞         | n. def.     |
| Huntingtin-interacting protein 12              | O75146;B3KN98;<br>B4DI31;Q6NXG8                                     | <i>HIP1R</i>    | ∞         | n. def.     |
| HLA-B-associated transcript 2-like 1           | Q5JSZ5-2;<br>Q5JSZ5;Q5H9R5;<br>Q5JSZ8;Q5JSZ5-1;<br>Q68CR0;Q9BU62    | <i>PRRC2B</i>   | 0,2836848 | 3,559736    |
| Uncharacterized protein C9orf142               | Q9BUH6-1;Q9BUH6                                                     | <i>C9orf142</i> | 2,52052   | 3,144879    |
| DNA-dependent protein kinase catalytic subunit | P78527-1; P78527;<br>P78527-2; B4DL41                               | <i>PRKDC</i>    | 1,12304   | 2,759198    |
| Coiled-coil domain-containing protein 124      | Q96CT7                                                              | <i>CCDC124</i>  | 0,280723  | 2,387402    |
| Barrier-to-autointegration factor              | O75531;B2R4V4                                                       | <i>BANF1</i>    | 1,801171  | 1,731426    |
| NAD(+) ADP-ribosyltransferase 1                | P09874;B1ANJ4;<br>B2R5W3;B4E0E1;<br>Q05D33;Q96P95                   | <i>PARP1</i>    | 1,776707  | 1,094172    |
| ATP-dependent DNA helicase 2 subunit 2         | P13010;Q53T09;<br>Q53TC2                                            | <i>XRCC5</i>    | 1,646734  | 1,032336    |
| ATP-dependent DNA helicase 2 subunit 1         | P12956;B2RDN9;<br>B1AHC8;B1AHC9;<br>B4DE32;B4E356;<br>Q6IC76;B1AHC7 | <i>XRCC6</i>    | 1,584924  | 1,025725    |
| Protein disulfide-isomerase A4                 | P13667;A8K4K6;<br>Q549T6                                            | <i>PDIA4</i>    | 1,079975  | 1,797987    |
| <b>Disassociating proteins</b>                 |                                                                     |                 |           |             |
| Annexin A7                                     | P20073-1                                                            | <i>ANXA7</i>    | -1,351544 | -0,329631   |
| Desmoplakin                                    | P15924-1                                                            | <i>DSP</i>      | -2,391304 | -2,347178   |
| Alpha-II spectrin                              | Q13813-3                                                            | <i>SPTAN1</i>   | 0,1421349 | -2,463026   |
| Caspase-14                                     | P31944                                                              | <i>CASP14</i>   | n. def.   | -2,685292   |
| Uncharacterized protein C1orf31                | Q5JTJ3-2                                                            | <i>C1orf31</i>  | -2,75967  | n. def.     |
| Cellular myosin heavy chain, type A            | P35579-1; P35579;<br>A8K6E4;                                        | <i>MYH9</i>     | -0,117446 | -2,799669   |
| Protein S100-A7;Psoriasin                      | P31151                                                              | <i>S100A7</i>   | n. def.   | -3,166308   |
| Cadherin family member 4;Desmoglein-1          | Q02413                                                              | <i>DSG1</i>     | -3,288417 | -2,654172   |
| Corneodesmosin;S protein                       | Q15517                                                              | <i>CDSN</i>     | n. def.   | -3,350647   |
| Calmodulin-like protein 5                      | Q9NZT1                                                              | <i>CALML5</i>   | n. def.   | -4,130517   |
| Collagen alpha-1(XIV) chain                    | Q05707-1                                                            | <i>COL14A1</i>  | -4,732395 | -1,932857   |
| Cystatin-A; Cystatin-AS; Stefin-A              | P01040                                                              | <i>CSTA</i>     | -5,107554 | -5,7702     |
| Dermcidin                                      | P81605;Q53YJ2;<br>A5JHP3                                            | <i>DCD</i>      | -5,143692 | n. def.     |

**Table S3, Related to Figure 1. GOCC annotation of dynamic CD81 interactors.**

Listed are the assigned GOCC categories, their accession number and the relative abundance in the dynamic CD81 interactor dataset. \* Percent of hits against total number of function hits; \*\* Percent of hits against total number of proteins.

| <b>GO Cellular Component Category</b> | <b>Accession</b> | <b>Protein #</b> | <b>Relative Abundance*</b> | <b>Relative Abundance**</b> |
|---------------------------------------|------------------|------------------|----------------------------|-----------------------------|
| cell junction                         | GO:0030054       | 1                | 4.2%                       | 7.7%                        |
| membrane                              | GO:0016020       | 2                | 8.3%                       | 15.4%                       |
| cell part                             | GO:0044464       | 5                | 20.8%                      | 38.5%                       |
| organelle                             | GO:0043226       | 4                | 16.7%                      | 30.8%                       |
| extracellular region                  | GO:0005576       | 1                | 4.2%                       | 7.7%                        |
| <b>cell part (GO:0044464):</b>        |                  |                  |                            |                             |
| plasma membrane                       | GO:0005886       | 2                | 40.0%                      | 33.3%                       |
| intracellular                         | GO:0005622       | 4                | 80.0%                      | 66.7%                       |
| <b>organelle (GO:0043226):</b>        |                  |                  |                            |                             |
| cytoskeleton                          | GO:0005856       | 4                | 100.0%                     | 100.0%                      |

**Table S4, Related to Figure 1. GOMF annotation of dynamic CD81 interactors.**

Listed are the assigned GOMF categories, their accession number and the relative abundance in the dynamic CD81 interactor dataset. \* Percent of hits against total number of function hits; \*\* Percent of hits against total number of proteins.

| <b>GO Molecular Function Category</b> | <b>Accession</b> | <b>Protein #</b> | <b>Relative Abundance*</b> | <b>Relative Abundance**</b> |
|---------------------------------------|------------------|------------------|----------------------------|-----------------------------|
| binding                               | GO:0005488       | 14               | 45.2%                      | 43.8%                       |
| catalytic activity                    | GO:0003824       | 6                | 19.4%                      | 18.8%                       |
| structural molecule activity          | GO:0005198       | 7                | 22.6%                      | 21.9%                       |
| enzyme regulator activity             | GO:0030234       | 3                | 9.7%                       | 9.4%                        |
| receptor activity                     | GO:0004872       | 2                | 6.5%                       | 6.3%                        |



**Table S5, Related to Figure 2. RNA interference screen scores.**

Statistical analysis of the RNAi screen for CD81 interactors with a role in HCV infection. Listed are the z scores, mad and mean scores as well as SD and p values for the 26 tested targets and the CD81 and scrambled controls. MOCK: uninfected cells.

| gene              | score    | mad     | meanscore | sd      | pval   |
|-------------------|----------|---------|-----------|---------|--------|
| scrambled 1, MOCK | -21,0668 | 14,7595 | -21,3090  | 10,1301 | 0,0000 |
| <i>SRFBP1</i>     | -6,2735  | 6,5952  | -6,3236   | 5,6513  | 0,0100 |
| <i>CD81</i>       | -5,7349  | 3,4583  | -9,0317   | 7,0965  | 0,0051 |
| <i>CALML5</i>     | -4,2423  | 4,3129  | -3,7624   | 2,7199  | 0,0032 |
| <i>S100A10</i>    | -3,9448  | 3,9451  | -3,0981   | 3,1183  | 0,0176 |
| <i>BANF1</i>      | -3,2962  | 3,2283  | -4,2092   | 2,6181  | 0,0013 |
| <i>CDSN</i>       | -2,9046  | 4,8357  | -2,2253   | 4,6406  | 0,1882 |
| <i>PARP1</i>      | -2,7506  | 2,4199  | -3,4268   | 2,7009  | 0,0052 |
| <i>MYH9</i>       | -2,4218  | 3,8065  | -3,0481   | 3,7948  | 0,0425 |
| <i>XRCC5</i>      | -2,4117  | 2,8505  | -1,8665   | 3,9261  | 0,1916 |
| <i>C9orf142</i>   | -2,3315  | 1,6008  | -3,0271   | 2,2362  | 0,0036 |
| <i>DSG1</i>       | -1,9096  | 5,9350  | -0,9646   | 5,2221  | 0,5946 |
| <i>HIP1R</i>      | -1,6771  | 2,5536  | -1,9805   | 2,0093  | 0,0182 |
| <i>PRRC2B</i>     | -1,4571  | 1,3322  | -1,1669   | 1,4441  | 0,0416 |
| <i>CCDC124</i>    | -1,0188  | 1,3338  | -0,9518   | 1,5889  | 0,1101 |
| <i>SPTBN1</i>     | -0,8147  | 2,1630  | -2,8339   | 3,4895  | 0,0408 |
| <i>PDIA4</i>      | -0,4584  | 2,0102  | -1,1406   | 2,9634  | 0,2815 |
| <i>DCD</i>        | -0,1385  | 3,4922  | -0,8216   | 2,7649  | 0,3987 |
| <i>ANXA7</i>      | -0,0843  | 1,0327  | -0,1850   | 1,3066  | 0,6821 |
| scrambled 1       | 0,0000   | 1,0000  | -0,0420   | 1,8602  | 0,8931 |
| <i>SPTAN1</i>     | 0,0044   | 0,7141  | -0,6366   | 2,1065  | 0,3911 |
| <i>XRCC6</i>      | 0,1374   | 1,3511  | 0,0182    | 2,3757  | 0,9822 |
| <i>S100A7</i>     | 0,1913   | 1,2528  | -0,5096   | 2,0425  | 0,4756 |
| <i>COL14A1</i>    | 0,9827   | 1,1261  | 0,1357    | 3,2186  | 0,9024 |
| <i>C1orf31</i>    | 1,5462   | 1,8941  | 1,6603    | 2,3879  | 0,0705 |
| <i>DSP</i>        | 1,2293   | 1,8185  | 1,7334    | 1,8029  | 0,0204 |
| <i>CASP14</i>     | 1,7643   | 0,8340  | 2,0439    | 1,4669  | 0,0031 |
| <i>PRKDC</i>      | 2,0198   | 2,8057  | 1,7071    | 2,7600  | 0,1006 |
| <i>CSTA</i>       | 2,0260   | 2,6606  | 1,9963    | 1,7432  | 0,0089 |

**Table. S6, Related to Figure 2. Dynamic CD81 binding proteins with a role in HCV infection.**

The six CD81 interactors with a putative role in HCV infection are listed. The average SILAC score, RNAi screen z score, silencing efficiency, endogenous protein function and previously reported role in virus infection are shown.

| Gene Name | Uniprot ID | MW (kd) | Average SILAC score [log <sub>2</sub> (H CV/ mock)] | RNAi phenotype [z score]  | RNAi efficiency [% of control siRNA] | Protein Function                                 | Role in Virus Infection                                                               |
|-----------|------------|---------|-----------------------------------------------------|---------------------------|--------------------------------------|--------------------------------------------------|---------------------------------------------------------------------------------------|
| SRFBP1    | Q8NEF9     | 48,63   | ∞                                                   | -6,27                     | 12,2                                 | transcription factor, chaperone                  | Unknown, this study                                                                   |
| S100A10   | P60903     | 11,2    | ∞                                                   | -3,94                     | 14,9                                 | signaling (EGFR target), endocytosis, exocytosis | HIV-1, papillomavirus, cytomegalovirus and respiratory syncytial virus entry          |
| BANF1     | O75531     | 10,06   | 1,77                                                | -3,3                      | 7,64                                 | DNA repair                                       | retrovirus integration, vaccinia virus DNA sensing                                    |
| PARP1     | P09874     | 113,08  | 1,44                                                | -2,75                     | 21,84                                | poly(ADP-ribosyl)ation                           | sequestered to cytoplasm by HIV-1 Vpr, component of Sindbis virus replication complex |
| MYH9      | P35579     | 226,53  | -1,46                                               | -2,42                     | 22,55                                | cytoskeletal movement, lamellipodial retraction  | Kaposi's sarcoma-associated herpesvirus macropinocytosis                              |
| SPTBN1    | Q01082     | 274,61  | ∞                                                   | -0,81 (mean-score: -2,83) | 7,6                                  | cytoskeletal movement at the plasma membrane     | Unknown                                                                               |

## SUPPLEMENTAL EXPERIMENTAL PROCEDURES

### Cells, Viruses and eE2

Huh-7, Huh-7.5 and 293T cells were maintained in DMEM (Invitrogen) with 10% FBS, 2 mM L-glutamine and 0.1 mM non-essential amino acids. *In vitro* transcripts of HCV full length and subgenomic genomes were prepared and transfected as described previously (Haid et al., 2010). HCV stocks were generated by electroporation of *in vitro*-transcribed RNA into Huh-7.5 cells. HCVcc particles were harvested in DMEM containing 1.5% FCS (J6/JFH clone2, (Catanese et al., 2010; Lindenbach et al., 2005)) or 10% FCS (Jc1 (Pietschmann et al., 2006), JcR2A (Reiss et al., 2011) and intergenotypic chimeras (Haid et al., 2012)) at 48 and 72 h post electroporation, filtered through a 0.45 µm pore size membrane and concentrated using 100 kDa cutoff Amicon Ultra centrifugal filters (Millipore). Experiments with HCV were carried out under biosafety level 3\* containment, in compliance with institutional and federal guidelines.

E2 ectodomain (eE2) encompassing residues 384–656 from the HCV J6 genome was expressed in GnTI– HEK293T cells and purified as described in (Khan et al., 2014).

Recombinant VSV expressing enhanced green fluorescent protein designated VSV\*M<sub>Q</sub> and VSV-FLuc was kindly provided by Gert Zimmer (Hoffmann et al., 2010). VSV\*M<sub>Q</sub> carries four attenuating mutations in the M protein and expresses GFP or FLuc from an additional transcriptional unit located between G and L. 20 hpi VSV\*M<sub>Q</sub>-infected cells were quantified by flow cytometry using a FACSCalibur or Accuri instrument (BD Bioscience). Human coronavirus 229E, in

which ORF 4 is replaced by *Renilla* luciferase, (HCoV229E-luc) was kindly provided by Volker Thiel (Pfefferle et al., 2011). Infectivity was measured 24 hpi by quantification of luciferase activity in lysates. All virus titers (50% tissue culture infective dose/ml) were calculated after serial dilution based on the 50% endpoint method of Reed and Muench (Ozanne, 1984).

Lentiviral pseudoparticles with no envelope or carrying HCV or VSV glycoproteins were generated by triple transfection of 293T cells with envelope protein expression constructs pcZ.VSV.Gwt, pcDNA3.ΔcE1E2 of the HCV isolates J6 and H77 or an empty vector control, HIV-1 gag-pol expression construct pCMV.DR8.74, and *Firefly* luciferase encoding lentiviral proplasmid pWPI.FLuc. 24 h post transfection media was changed to DMEM containing 3% FCS and lentiviral pseudoparticles were harvested 48 and 72 h post transfection. Pooled supernatants were supplemented with 20 mM HEPES and 5 µg/ml polybrene and used immediately for transduction of target cells.

### **Primary Human Hepatocytes**

Primary human hepatocytes were isolated from liver specimens obtained after partial hepatectomy and plated on collagen at a density of  $1.3 \times 10^6$  cells in P6 dishes as described in (Kleine et al., 2014). Cells were kept in hepatocyte culture medium (Lonza) and transduced with lentiviral pseudoparticles encoding an shRNA targeting SRFBP1 one day post plating. Pseudoparticles were removed 5 h post transduction and cells infected with Jc1 HCVcc 19 h later. 5 h post infection, cells were washed three times with PBS and hepatocyte culture

medium added. 24 h post infection supernatants were titrated on Huh-7.5 and cells lysed for RNA isolation to confirm SRFBP1 silencing. HCV titers were determined by NS5A immunocytochemistry at 72 h.

### **Immunoprecipitation for SILAC**

One-step immunoprecipitations of membrane proteins were performed by adapting the protocol of (Schneider et al., 1982) to a commercial crosslinking IP kit (Pierce). In detail, isotope labeled cells were incubated with HCV for 15 min, washed once with ice-cold PBS and scraped into ice-cold PBS before pelleting. Cells were then lysed with 1 ml/P150 IP buffer (1% NP40, 10% glycerol, 1 mM CaCl<sub>2</sub>, 100 mM NaCl in 50 mM Hepes, pH 7.4) supplemented with EDTA-free protease inhibitor mix (Sigma) on ice for 30 min. Nuclear debris was pelleted at 12000xg for 10 min at 4°C. Lysates were precleared with 70ul protein blocked A/G agarose slurry/1ml lysate for 60 min at 4°C rotating, loaded onto equilibrated anti-CD81 (Santa Cruz, # sc-7637) and isotype (BD Bioscience, #555746) agarose columns (Pierce, antibodies crosslinked with disuccinimidyl suberate to protein A/G agarose according to manufacturer's instructions) and precipitated o/n at 4°C rotating. Flowthroughs were collected, beads from heavy and light conditions combined and washed three times with IP buffer. Proteins were eluted stepwise with 100 mM glycine (pH 2.8) and precipitated o/n with five volumes of ethanol and 100 mM Na-acetate (pH 5.0) using glycogen as precipitation helper. Equivalent volumes of IP lysate input, flowthrough and eluate were kept for immunoblot quality control.

## **LC MS/MS Analysis**

Proteins were denatured, reduced, alkylated and digested with trypsin as described in (Butter et al., 2012; Meissner et al., 2013). Peptides were desalted on reversed phase C18 StageTips and acidified with 2% acetonitrile, 0.1% trifluoroacetic acid in 0.1% formic acid. A nanoflow UHPLC instrument (Thermo Fisher Scientific) was coupled on-line to an Orbitrap Elite™ Hybrid Ion Trap-Orbitrap mass spectrometer (Thermo Fisher Scientific) with a nanoelectrospray ion source (Thermo Fisher Scientific). Peptides were loaded onto a C18-reversed phase column, separated and MS data acquired using Xcalibur software. Peptides were separated by HPLC over a 150 min gradient from 2% to 60% acetonitrile and analyzed in an Orbitrap Elite mass spectrometer (Thermo Fisher Scientific). Full-scan MS was acquired with 120,000 resolution in the Orbitrap analyzer, and up to the ten-most intense ions from each full scan were fragmented with collision-induced dissociation and analyzed in the linear ion trap.

## **MS Bioinformatics**

Mass spectra were analyzed using MaxQuant software version 1.2.6.1. Carbamidomethylcysteine was set as a fixed modification, N-terminal acetylation and methionine oxidation as variable modifications. The spectra were searched by the Andromeda search engine against the human International Protein Index protein sequence database (IPI version 3.68) combined with 248 common contaminants and concatenated with the reversed versions of all sequences. Protein identification required at least one unique or razor peptide per protein

group. The required false positive rate was set to 1% at the peptide and 1% at the protein level, and the minimum required peptide length was set to 6 amino acids. Contaminants, reverse identification and proteins only identified by site were excluded from further data analysis, which was performed in Perseus (Cox and Mann, 2012).

## **PANTHER and DAVID Annotation Clustering Network and Combined**

### **DAVID/STRING Functional Gene View**

We performed functional annotation clustering and enrichment scoring of all 26 SILAC hits using PANTHER (Thomas et al., 2003) (Fig. 1D and 1E) or DAVID (<http://david.abcc.ncifcrf.gov>) version 6.7, with “high” classification stringency settings (Huang da et al., 2009) (Fig. 1F). DAVID analysis yielded 12 highly enriched clusters (EASE score above 1) and 17 clusters in total. We next generated a combined network view based on STRING database interactions and DAVID functional annotation clustering using a Matlab script described in (Mercer et al., 2012) and Cytoscape for visualization. Briefly, we used STRING 9.1 (<http://www.string-db.org>) to generate interaction networks of significant SILAC hits with a 2.1-fold or stronger dynamic CD81 interaction (Franceschini et al., 2013). Then, each protein was assigned to the cluster with the highest enrichment, in which the protein was present in the highest fraction of individual annotations. Selected unclustered proteins were placed back in the visualization as inverted arrowheads. All STRING interactions (solid lines) with a confidence score of 0.9 or higher, and all interactions of 0.35 or higher between genes within

the same functional annotation cluster were added. Finally, we manually placed functional annotation clusters in their approximate cellular locations. Selected proteins with two cellular locations were placed into both respective places (see Figure 1F).

### **RNAi Screen for HCV Host Factors and Bioinformatic Analysis**

Huh-7.5 cells stably expressing *Firefly* luciferase (Huh-7.5 FLuc) were seeded at a density of  $3 \times 10^4$  cells per well in a 96 well plate 5 h prior to transfection (Gentsch et al., 2011). RNA interference against the 28 dynamic CD81 interaction partners was achieved with a pool of three independent targeting siRNAs (Ambion Silencer Select). When available validated siRNA were selected. Two scrambled siRNAs served as negative and a pool of three CD81 targeting siRNAs as positive control. To avoid plate effects, four scrambled controls were randomly positioned on the plate and edges were left untreated. We transfected 0.5 pmoles of each siRNA per 96 well using lipofectamine RNAiMax (Invitrogen) according to the manufacturer's instructions. Cells were infected with the *Renilla* luciferase reporter virus JcR2A 48 h post transfection (MOI 0.1) and the inoculum replaced with medium 4 h later. Infectivity was assayed 48 hpi by quantification of *Firefly* and *Renilla* luciferase activity. Residual plate effects were computationally accounted for by normalization to the scrambled control reads. We observed no effect on cell proliferation or viability with the 28 targeting siRNA pools. The CD81 siRNA pool reduced cell proliferation in accordance with the described proliferative role of CD81 (Oren et



al., 1990). In order to eliminate proliferation dependent effects, the specific HCV infectivity was calculated by normalization of *Renilla* luciferase activity (infectivity readout) to *Firefly* luciferase activity (viability readout).

### **HCVcc Infection and Whole Life Cycle Assay**

Huh-7.5 FLuc cells were electroporated with HCV JcR2A RNA and plated in a 24 well dish (Gentzsch et al., 2011). We transfected a pool of three siRNAs (2.5 pmol per well of each siRNA) using Lipofectamine RNAiMax five hours after electroporation according to the manufacturer's instructions (Invitrogen). 72 and 96 h post electroporation supernatants were collected and used to infect naïve cells. The latter cells were analyzed 72 hpi to evaluate a role of the targeted gene in assembly and release. At the same time producer cell lysates were collected at 72 and 96 h post electroporation to assay for a role of the target gene in HCV replication. HCV replication as well as assembly and release were quantified by assaying for *Renilla* luciferase activity in producer and receiver cell lysates. Cell viability was assessed by *Firefly* luciferase activity measurement in the same lysates. Assembly and release values were normalized for replication values to exclude that impaired replication would influence assembly and release readouts.

### **Pseudoparticle Infection**

Huh-7.5 cells were transduced with lentiviral pseudoparticles encoding *Firefly* luciferase 48 h post siRNA silencing. Luciferase activity was determined and

HCVpp specific infectivity calculated by normalization to VSV pseudotypes and a scrambled siRNA control.

### **Plasma Membrane Fusion Assay**

To assay for endosomal acidification independent HCV uptake, we adapted a previously described membrane fusion assay (Bitzegeio et al., 2010; Tscherne et al., 2006). Briefly, Huh-7.5 cells were plated at a density of  $5 \times 10^5$  cells per 6-well in poly-lysine treated dishes and transfected with 5 nM concanamycin A to prevent acidification of endosomal compartments and thereby block the natural route of HCV entry. Concentrated virus (HCV JcR2A, HCoV229E-luc, VSV-FLuc) was allowed to bind to the cells for 2 h at 4°C in the presence of concanamycin A. After two PBS washes cells were shifted to 37°C for 1 h in the continuous presence of concanamycin A to allow glycoprotein priming. Membrane fusion was induced by a 5 min wash with pH 5 citric acid buffer. Background infection was assessed by a 5 min wash with pH 7 citric acid buffer. To complete virus uptake, cells were incubated for an additional 3 h with medium containing concanamycin A, then medium replaced and luciferase activity measured 24 hpi (HCoV229E-luc, VSV-FLuc) and 48 hpi (HCV JcR2A).

### **Translational Reporter Assay**

The pIRF bicistronic reporter plasmid was kindly provided by Annie Cahour, Jean Dubuisson and Yves Rouille and in vitro transcribed and capped as described in (Laporte et al., 2000). Full length (pFK\_i389F-Luc-EI-Core-5B/JFH1\_dg) and

subgenomic (pFK\_i389LucNS2-3'\_JFH\_dg) HCV constructs and their polymerase deficient  $\Delta$ GDD mutants were transcribed as described previously (Haid et al., 2010). Huh-7.5 cells were lipofected with 1  $\mu$ g RNA per 96-well and translational activity measured after 8 h by assessing luciferase activity in cell lysates.

### **Immunoblot and RT-PCR**

For western blot analysis, equivalent volumes of cell lysates, IP flowthroughs, IP eluates or Nycodenz gradient fractions were boiled 5 min with SDS sample buffer under reducing conditions, resolved by SDS-PAGE and transferred to PVDF membranes by electroblotting. Membranes were probed for o/n at 4°C with primary antibodies (SRFBP1, Abcam ab109598; CLDN1, Invitrogen 374900; OCLN, Invitrogen 33-1500; actin, Sigma A2228; GAPDH, Sigma G9545), for 1 h at room temperature with secondary HRP or Alexa-fluorophore conjugated antibodies and analyzed using a chemiluminescence (Intas) or fluorescence detection system (Odyssey CL, Licor).

Total cellular and viral RNA was isolated using the NucleoSpin kit according to the manufacturer's instructions (Macherey-Nagel). Absolute quantification of mature SRFBP1 transcripts and viral RNA genomes was achieved by Taqman multiplex amplification (Applied Biosystems) using the following oligonucleotides and probes: SRFBP1-F 5'-CCATgCCATgAAggAATTgAAAC-3', SRFBP1-R 5'-gCTTgTACAgCAgCTTTTAgCAC-3', SRFBP1-TM 5'-FAM-TTgCTCTTTCAgTTgCAgTAgAATCTggCT-BBQ-3'; JFH-1-F 5'-TCT GCG GAA

CCG GTG AGT A-3', JFH-1-R 5'-GGG CAT AGA GTG GGT TTA TCC A-3', JFH-TM 5'-FAM-AAA GGA CCC AGT CTT CCC GGC AAT T-TAMRA-3'. GAPDH served as internal standard (GAPDH-F 5'-GAA GGT GAA GGT CGG AGT C-3', GAPDH-R 5'-GAA GAT GGT GAT GGG ATT TC-3', GAPDH-TM 5'-TET-CAA GCT TCC CGT TCT CAG CCT-TAMRA-3').

Quantification of SILAC hit transcripts after silencing was achieved by SYBRgreen PCR using primers selected from the Harvard PrimerBank (<http://pga.mgh.harvard.edu/primerbank>) and GAPDH as standard for normalization.

### **Flow Cytometry and Immunofluorescence Microscopy**

For immunofluorescence analysis Huh-7.5 cells were plated on poly-lysine coated cover slips and where indicated washed with PBS, incubated with 2ug/ml eE2, 7.5 ug/ml E2 antibody (AP33) (Owsianka et al., 2001), or HCV (J6JFH clone 2, MOI 10) for 15 min, washed with PBS and fixed with 3% paraformaldehyde for 20 min. After three PBS washes, cells were permeabilized with 0.05% TX-100 for 4 min and incubated with primary antibodies (SRFBP1, Abcam ab109598; CD81, BD 555675; CLDN1, Invitrogen 374900; OCLN, Invitrogen 33-1500; SR-BI NK-5H8-E3; LAMP1, Abcam ab25630; EEA1, BD 612006; p230, BD 611281; LBPA, MoBiTec Z-PLBPA-1-EC; Calnexin, Abcam ab31290; GLUT4, Abcam ab166704; DDX6, Abcam ab54611; Ataxin-2, BD 611378) followed by staining with secondary Alexa-fluorophore conjugated antibodies. Membranes, F actin and G actin were stained with Alexa-conjugated WGA, phalloidin and DNase I,

respectively, (Molecular Probes) according to the manufacturer's instructions. For lipid droplet staining with oil red O (Sigma, O0625-25G) cells were rinsed with H<sub>2</sub>O, then with 60% isopropanol and incubated with the filtered dye solution for 2 min at room temperature followed by washes with 60% isopropanol and H<sub>2</sub>O. DAPI counterstained cells were mounted on glass slides with ProLong Gold antifade mountant (Molecular Probes, W32466) and analyzed by confocal microscopy using an inverted confocal laser-scanning microscope (Olympus Fluoview 1000), using a 60x or 100x magnification lens. The three channels (blue, green, and red) were read in a sequential acquisition mode, with an average of 3 frames for each picture (Kalman  $n = 3$ ). Data analysis was performed using FluoView (Olympus) and Image J. Intensity correlation analysis was performed using the Image J colocalization analysis plugin. Pearson's colocalization coefficients were calculated for at least four individual frames with 20-40 cells.

For flow cytometry, cells were trypsinized, quenched and surface stained with primary antibodies (CLDN1, R&D MAB4618; SR-BI, NB400-104; CD81, sc-23962) in PBS containing 1% FCS for 30 min on ice. After a brief wash, secondary PE- or Alexa488-conjugated secondary antibodies were added for 30 min on ice. Cells were washed three times and analyzed on a FACSCalibur (BD Bioscience). Data analysis was performed using FlowJo.

## **Flotation Assays**

To assess membrane association of SRFBP1 we performed membrane flotation assays according to (Ghibaud et al., 2004). Briefly,  $2.8 \times 10^6$  Huh-7.5 cells were plated in 10 cm dishes and transduced with SRFBP1-mycDDK encoding pseudoparticles 5 h later. 60 h post transduction cells were washed once with PBS, scraped into 10 ml ice cold PBS, pelleted and resuspended in 0.5 ml ice cold hypotonic lysis buffer (10 mM Tris-HCl, pH 7.5, 2 mM  $MgCl_2$ ) supplemented with protease inhibitors (Sigma). After 30 min incubation on ice, cells were dounce homogenized with 12 strokes and cellular debris pelleted at 1000xg for 5 min at 4 °C. Membranes were disrupted in 200  $\mu$ l lysate with 1% TX-100 for 10 min on ice. TX100 treated and untreated samples were diluted with 75% Nycodenz to a final concentration of 37,5%. 0.4 ml of this suspension was overlaid with 0.8 ml 35% Nycodenz and 0.1 ml 5% Nycodenz in PBS. Equilibrium ultracentrifugation was carried out for 22 h at 4°C in a Beckmann TLA-55 rotor at 47,000 rpm, 160  $\mu$ l fractions collected and analyzed by SDS PAGE and immunoblot for SRFBP1, GAPDH and CLDN1.

## SUPPLEMENTAL REFERENCES

Bitzegeio, J., *et al.* (2010). Adaptation of hepatitis C virus to mouse CD81 permits infection of mouse cells in the absence of human entry factors. *PLoS pathogens* 6, e1000978.

Butter, F., *et al.* (2012). Proteome-wide analysis of disease-associated SNPs that show allele-specific transcription factor binding. *PLoS Genet* 8, e1002982.

Catanese, M.T., *et al.* (2010). Role of scavenger receptor class B type I in hepatitis C virus entry: kinetics and molecular determinants. *Journal of virology* 84, 34-43.

Cox, J., and Mann, M. (2012). 1D and 2D annotation enrichment: a statistical method integrating quantitative proteomics with complementary high-throughput data. *BMC bioinformatics* 13 Suppl 16, S12.

Franceschini, A., *et al.* (2013). STRING v9.1: protein-protein interaction networks, with increased coverage and integration. *Nucleic acids research* 41, D808-815.

Gentzsch, J., *et al.* (2011). Hepatitis C virus complete life cycle screen for identification of small molecules with pro- or antiviral activity. *Antiviral research* 89, 136-148.

Ghibardo, D., *et al.* (2004). Characterization of GB virus B polyprotein processing reveals the existence of a novel 13-kDa protein with partial homology to hepatitis C virus p7 protein. *The Journal of biological chemistry* 279, 24965-24975.

Haid, S., *et al.* (2012). A plant-derived flavonoid inhibits entry of all HCV genotypes into human hepatocytes. *Gastroenterology* 143, 213-222 e215.

Haid, S., *et al.* (2010). Mouse-specific residues of claudin-1 limit hepatitis C virus genotype 2a infection in a human hepatocyte cell line. *Journal of virology* 84, 964-975.

Hoffmann, M., *et al.* (2010). Fusion-active glycoprotein G mediates the cytotoxicity of vesicular stomatitis virus M mutants lacking host shut-off activity. *The Journal of general virology* 91, 2782-2793.

Huang da, W., *et al.* (2009). Systematic and integrative analysis of large gene lists using DAVID bioinformatics resources. *Nature protocols* 4, 44-57.

Khan, A.G., *et al.* (2014). Structure of the core ectodomain of the hepatitis C virus envelope glycoprotein 2. *Nature* 509, 381-384.

Kleine, M., *et al.* (2014). Explanted diseased livers - a possible source of metabolic competent primary human hepatocytes. *PloS one* 9, e101386.

Laporte, J., *et al.* (2000). Comparative analysis of translation efficiencies of hepatitis C virus 5' untranslated regions among intraindividual quasispecies present in chronic infection: opposite behaviors depending on cell type. *Journal of virology* 74, 10827-10833.

Lindenbach, B.D., *et al.* (2005). Complete replication of hepatitis C virus in cell culture. *Science* 309, 623-626.

Meissner, F., *et al.* (2013). Direct proteomic quantification of the secretome of activated immune cells. *Science* 340, 475-478.

Mercer, J., *et al.* (2012). RNAi screening reveals proteasome- and Cullin3-dependent stages in vaccinia virus infection. *Cell reports* 2, 1036-1047.

Oren, R., *et al.* (1990). TAPA-1, the target of an antiproliferative antibody, defines a new family of transmembrane proteins. *Mol Cell Biol* 10, 4007-4015.

Owsianka, A., *et al.* (2001). Functional analysis of hepatitis C virus E2 glycoproteins and virus-like particles reveals structural dissimilarities between different forms of E2. *The Journal of general virology* 82, 1877-1883.

Ozanne, G. (1984). Estimation of endpoints in biological systems. *Comput Biol Med* 14, 377-384.

Pfefferle, S., *et al.* (2011). The SARS-coronavirus-host interactome: identification of cyclophilins as target for pan-coronavirus inhibitors. *PLoS pathogens* 7, e1002331.

Pietschmann, T., *et al.* (2006). Construction and characterization of infectious intragenotypic and intergenotypic hepatitis C virus chimeras. *Proceedings of the National Academy of Sciences of the United States of America* 103, 7408-7413.

Schneider, C., *et al.* (1982). A one-step purification of membrane proteins using a high efficiency immunomatrix. *The Journal of biological chemistry* 257, 10766-10769.

Thomas, P.D., *et al.* (2003). PANTHER: a library of protein families and subfamilies indexed by function. *Genome research* 13, 2129-2141.

Tscherne, D.M., *et al.* (2006). Time- and temperature-dependent activation of hepatitis C virus for low-pH-triggered entry. *Journal of virology* 80, 1734-1741.
